# Supplementary material
Source: PubMed Central journal article supplement (PMC3204037)

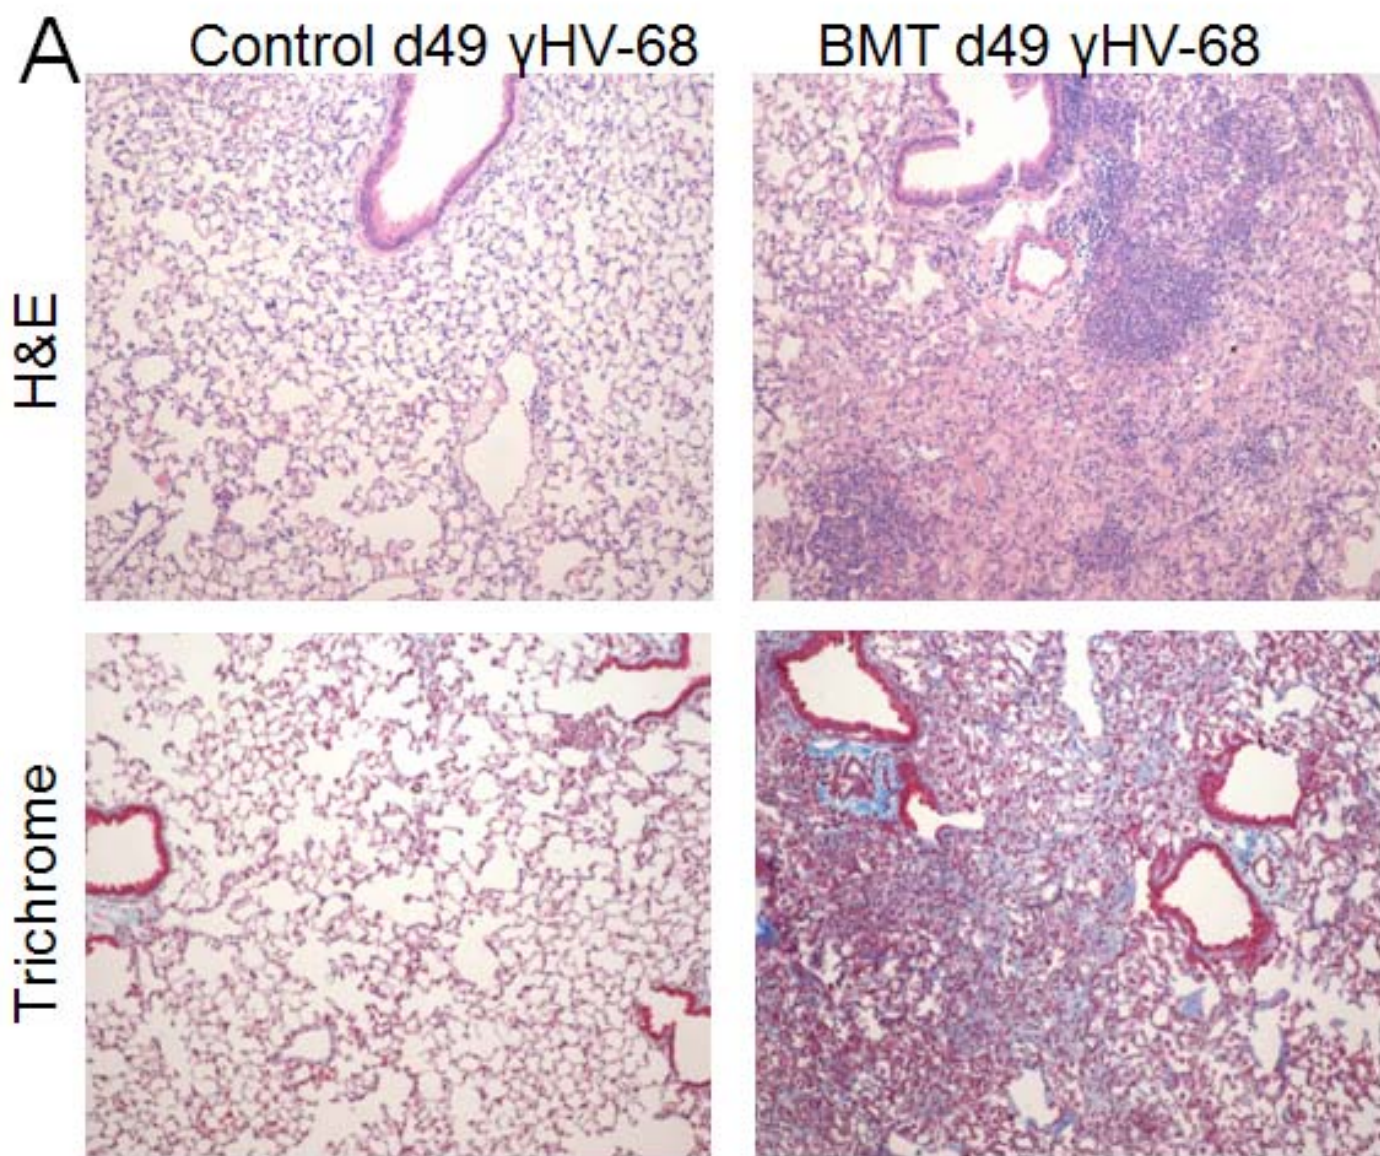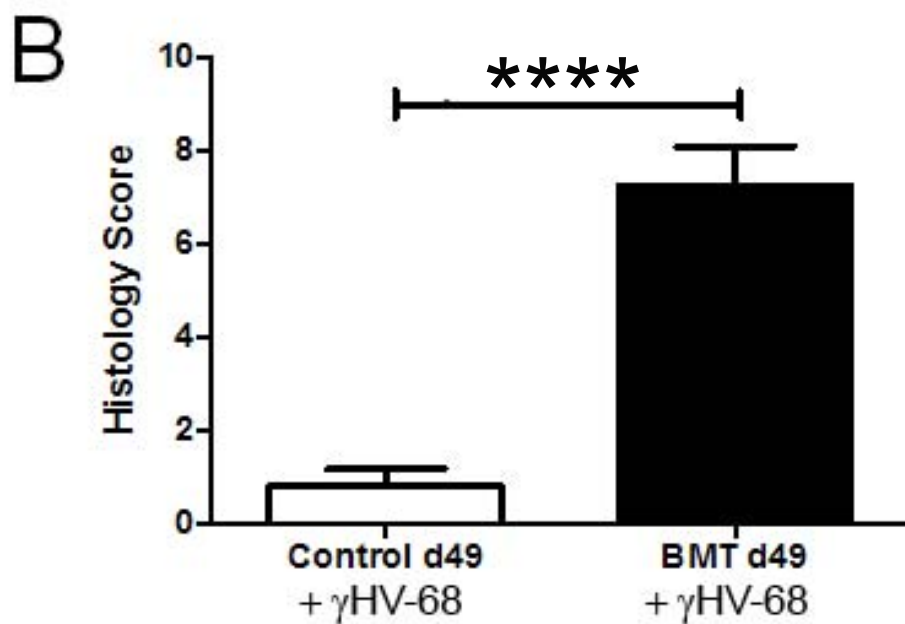

Fig S1

Supplement: mmc1.pdf [file mmc1.pdf]

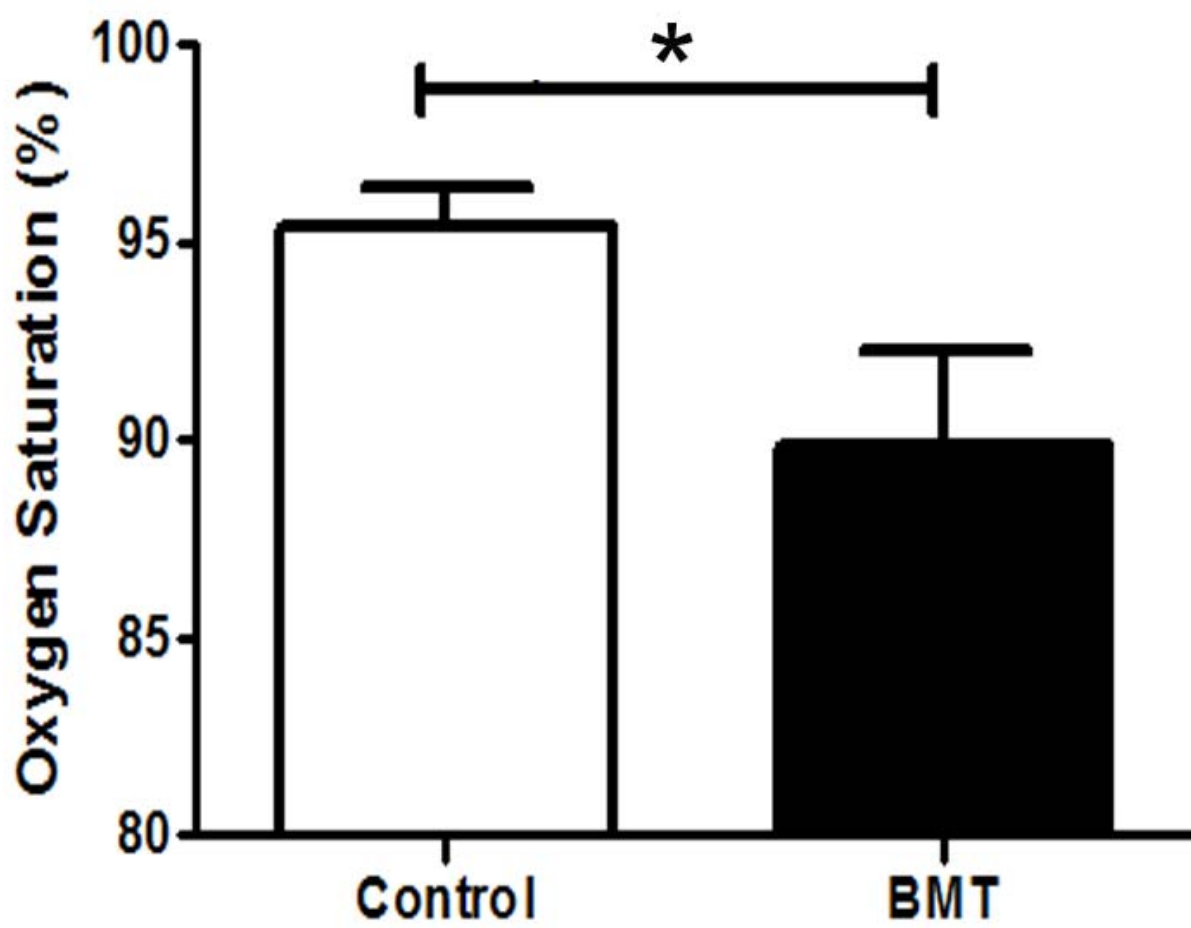

Fig S2

Supplement: mmc2.pdf [file mmc2.pdf]

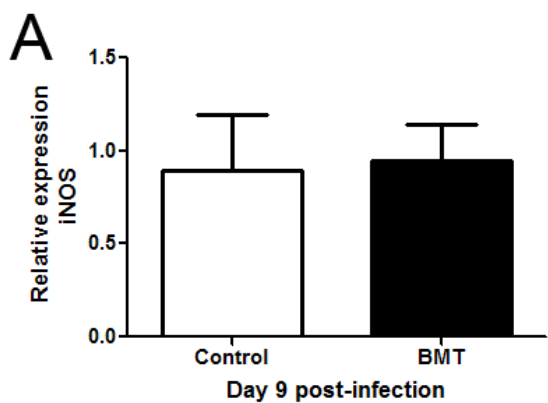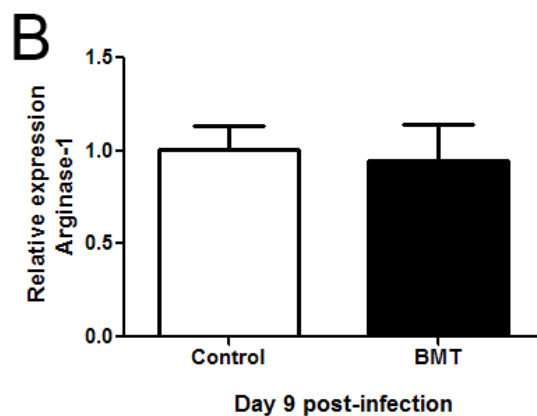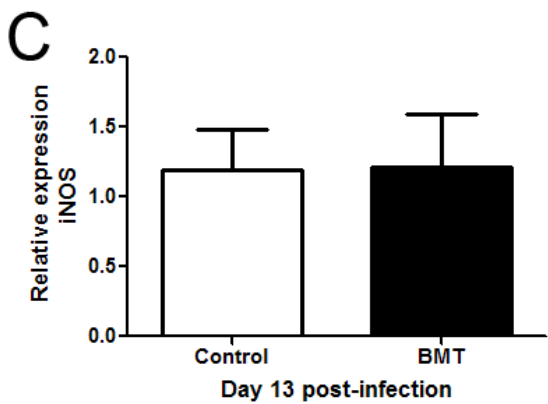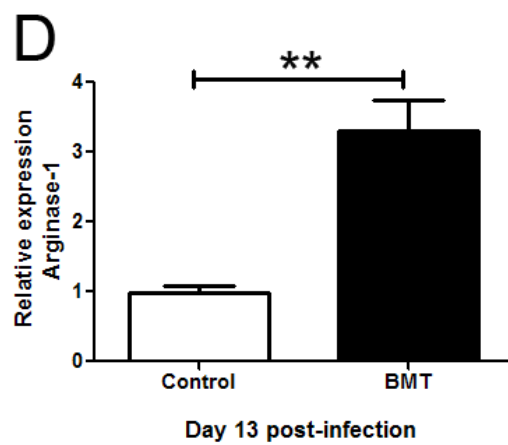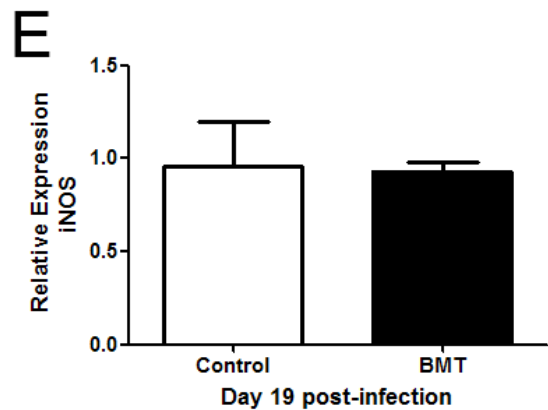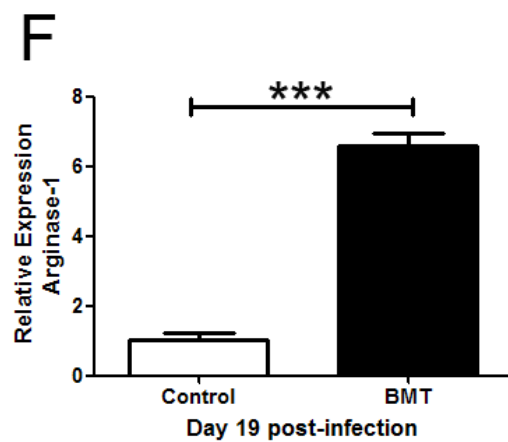

Fig S3

Supplement: mmc3.pdf [file mmc3.pdf]

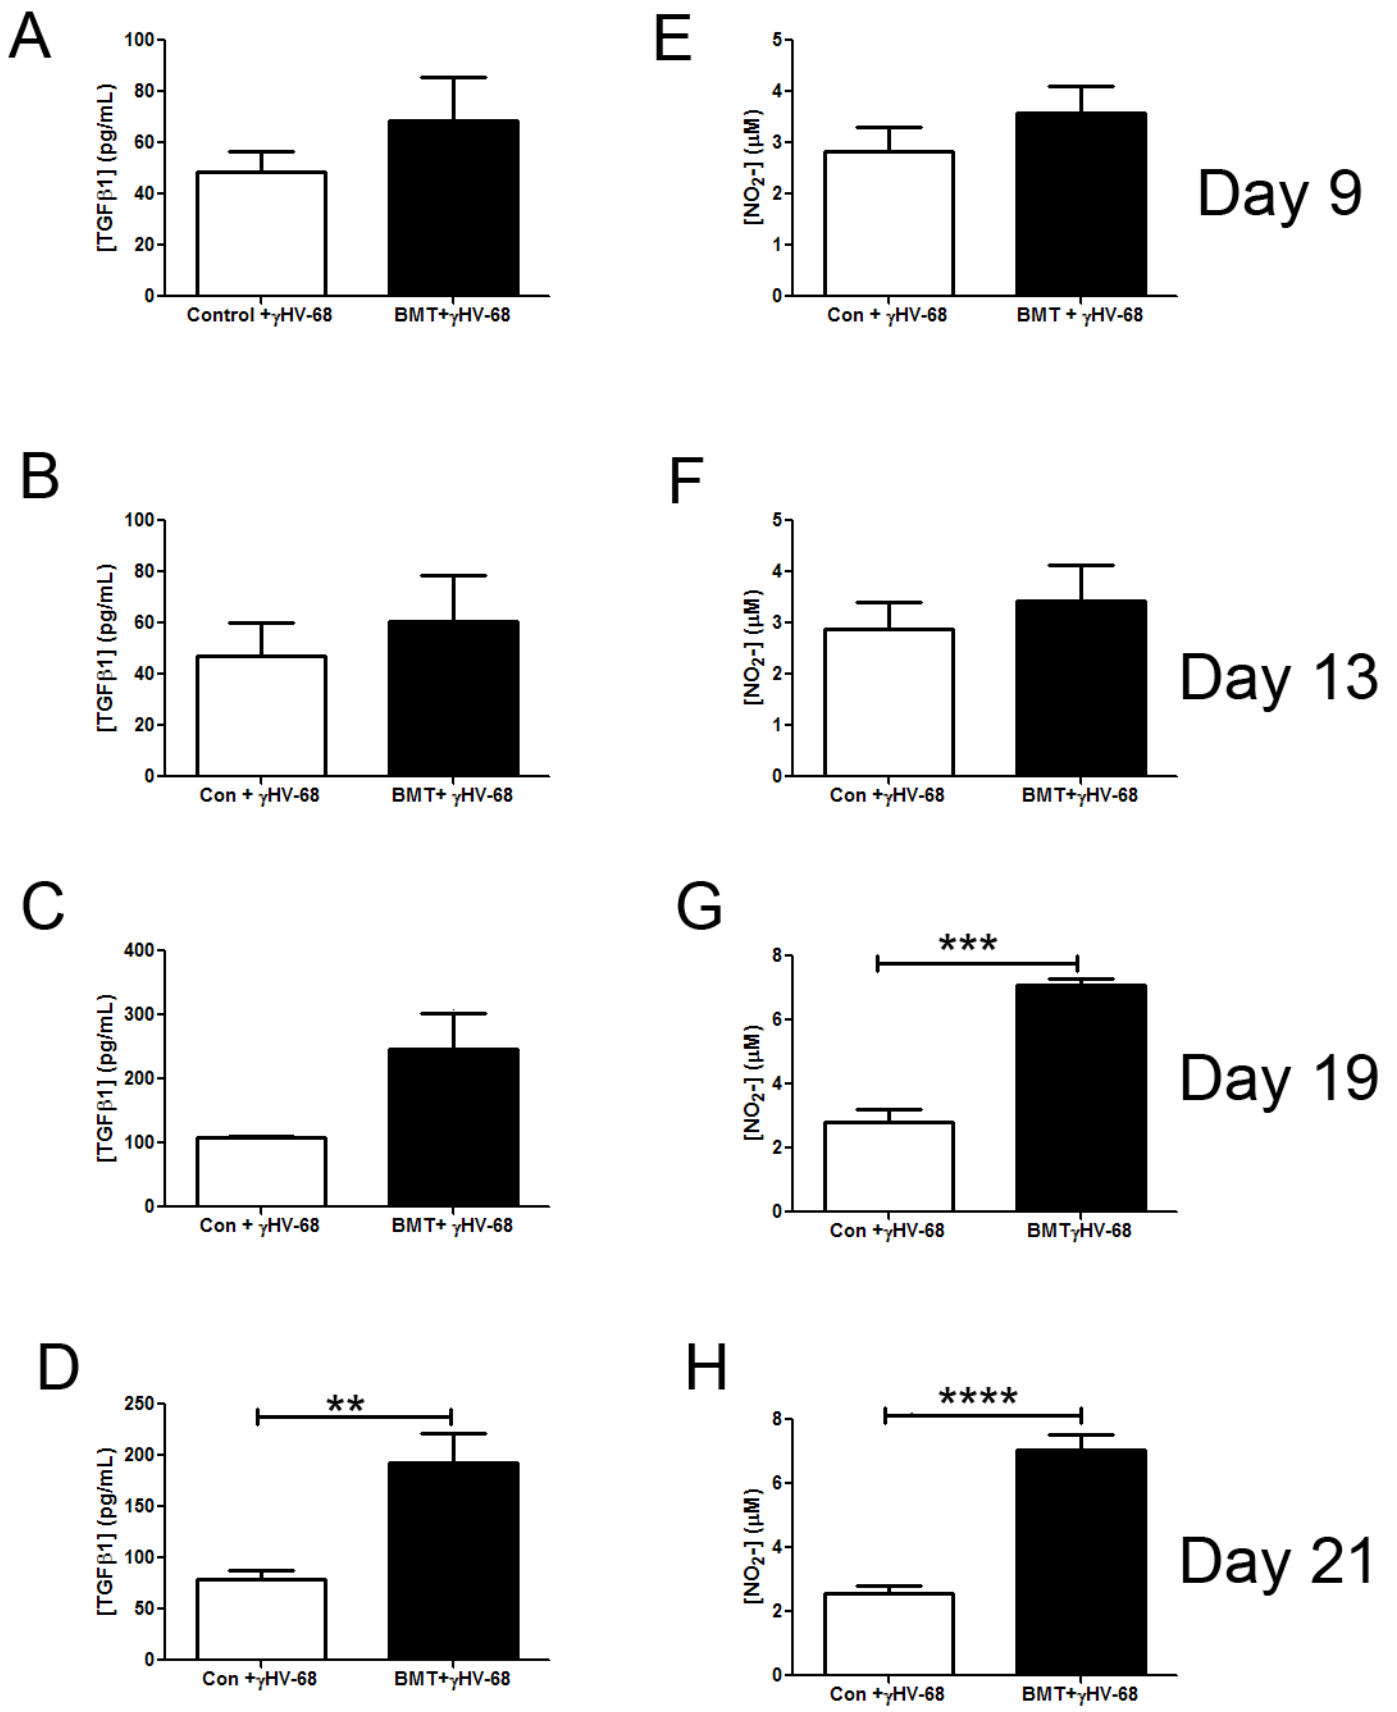

Fig S4

Supplement: mmc4.pdf [file mmc4.pdf]

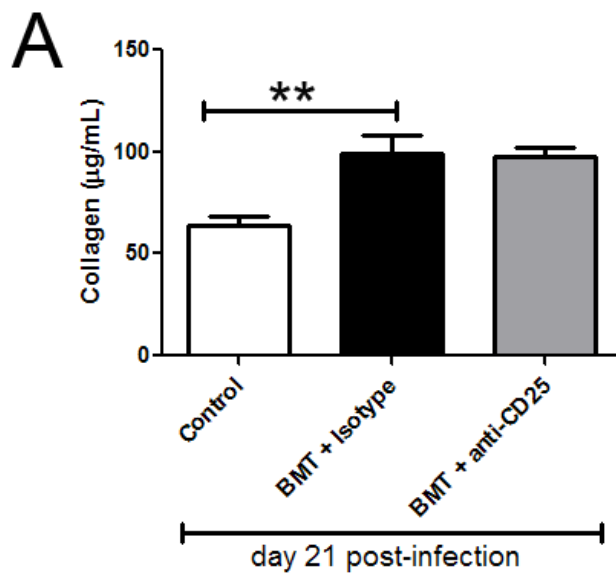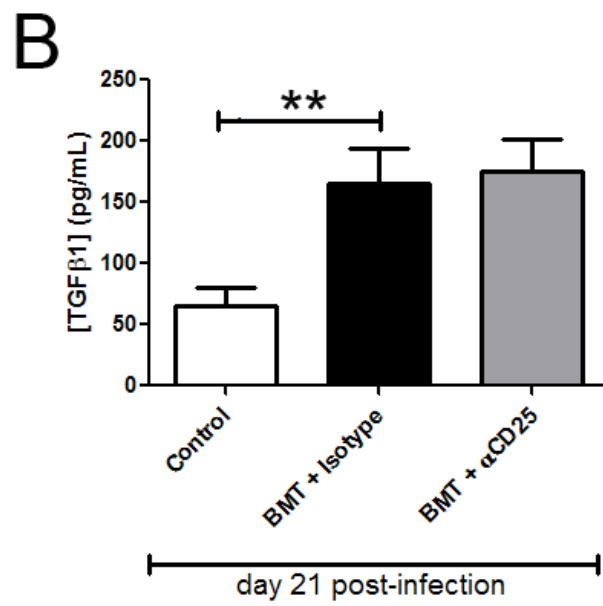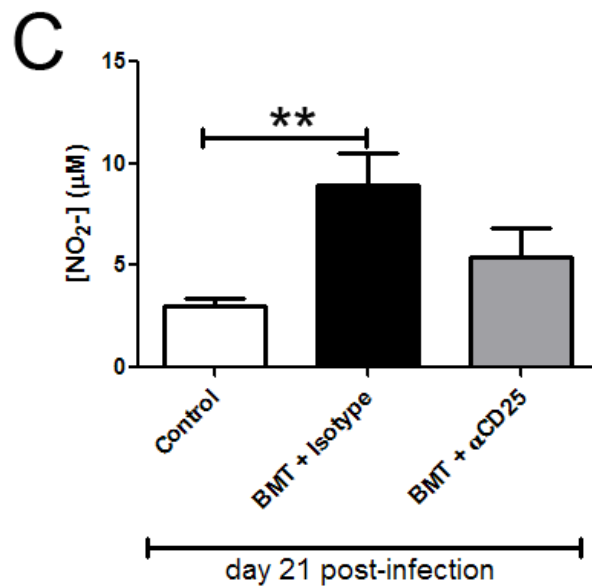

Fig S5

Supplement: mmc5.pdf [file mmc5.pdf]

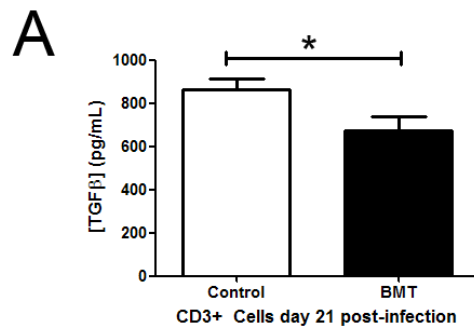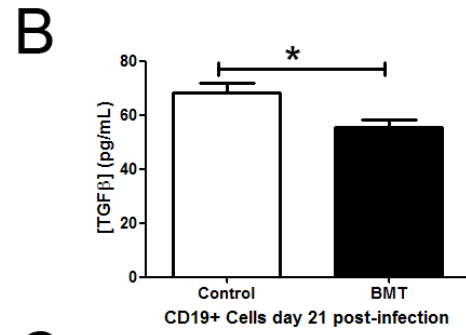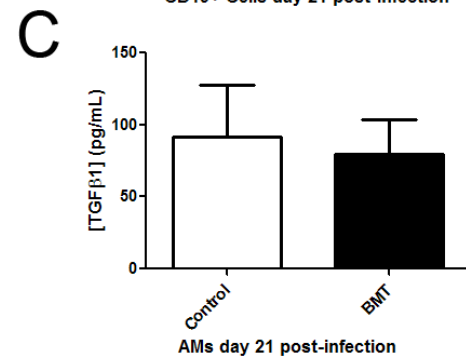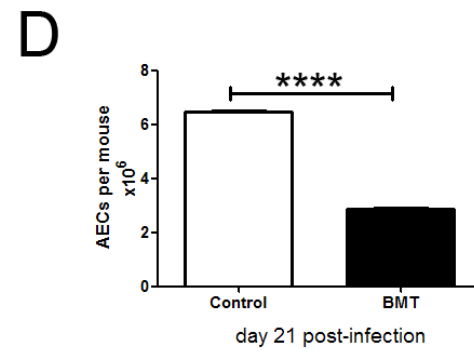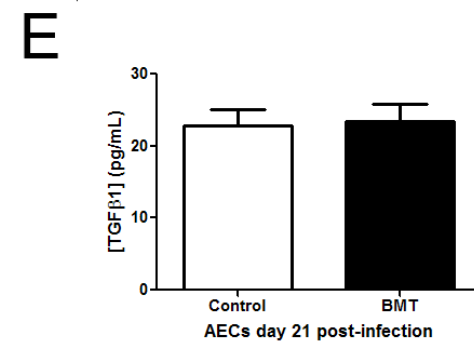

Fig S6

Supplement: mmc6.pdf [file mmc6.pdf]

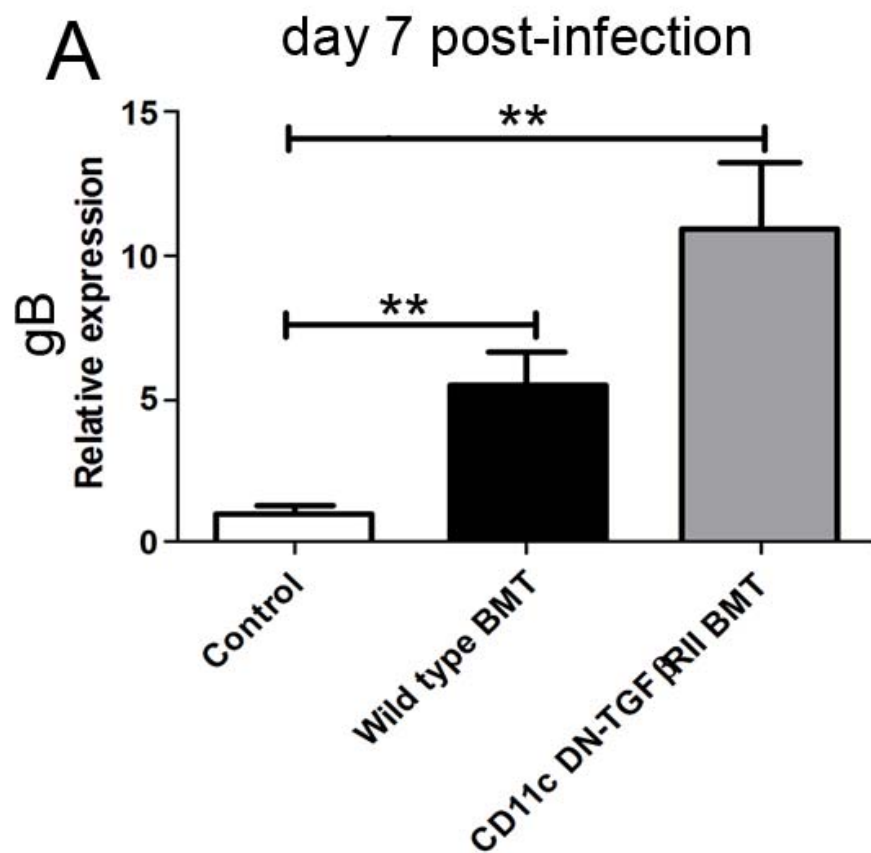

**B** CD11c DN-TGFβRII BMT

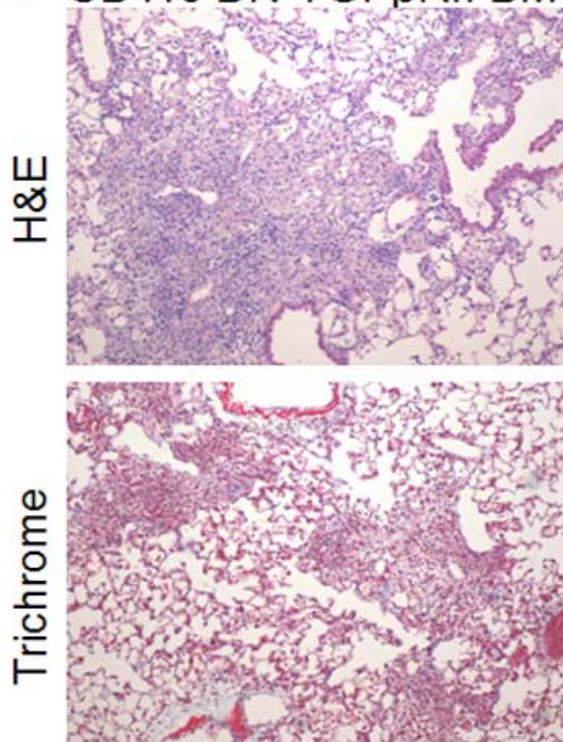

day 21 post-infection

**C** day 21 post-infection

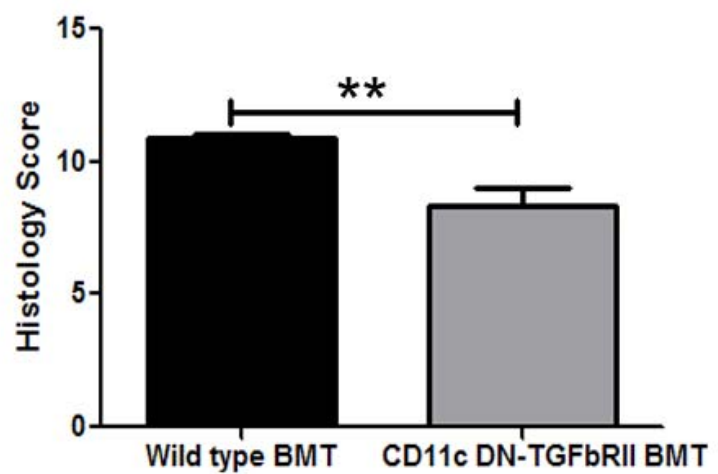

Fig S7

Supplement: mmc7.pdf [file mmc7.pdf]
